# Supplementary material for: Evolutionary history and leaf succulence as explanations for medicinal use in aloes and the global popularity of Aloe vera
Source: PubMed Central journal article supplement (PMC4342203; doi:10.1186/s12862-015-0291-7), 2015-02-26

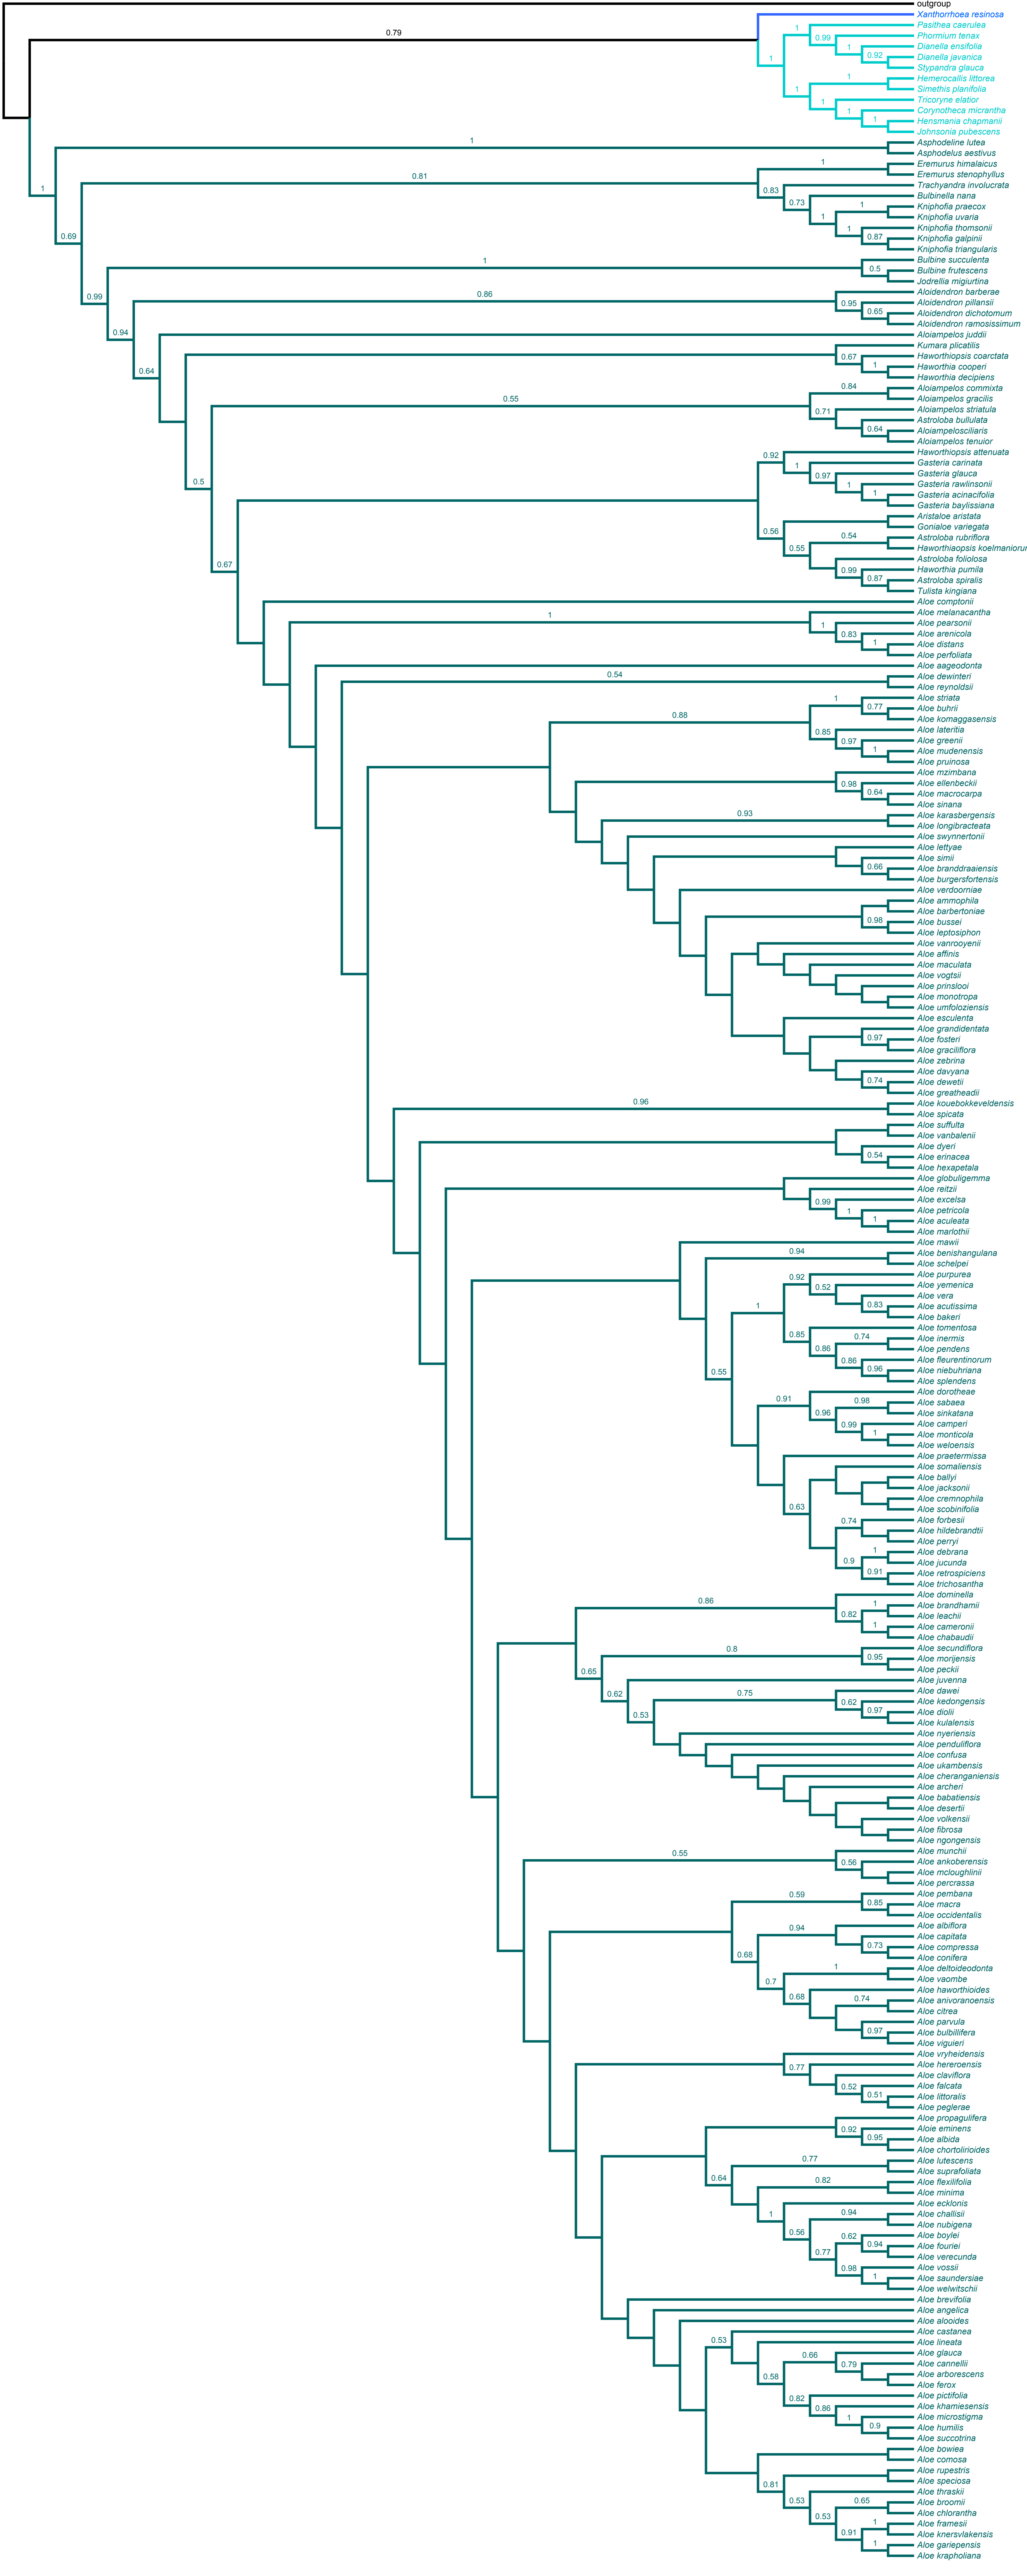

Supplement: 12862_2015_291_MOESM2_ESM.pdf [file 12862_2015_291_MOESM2_ESM.pdf]
