# Supplementary material for: Evolutionary history and leaf succulence as explanations for medicinal use in aloes and the global popularity of Aloe vera
Source: PubMed Central journal article supplement (PMC4342203; doi:10.1186/s12862-015-0291-7), 2015-02-26
Supplement: 12862_2015_291_MOESM3_ESM.pdf [file 12862_2015_291_MOESM3_ESM.pdf]

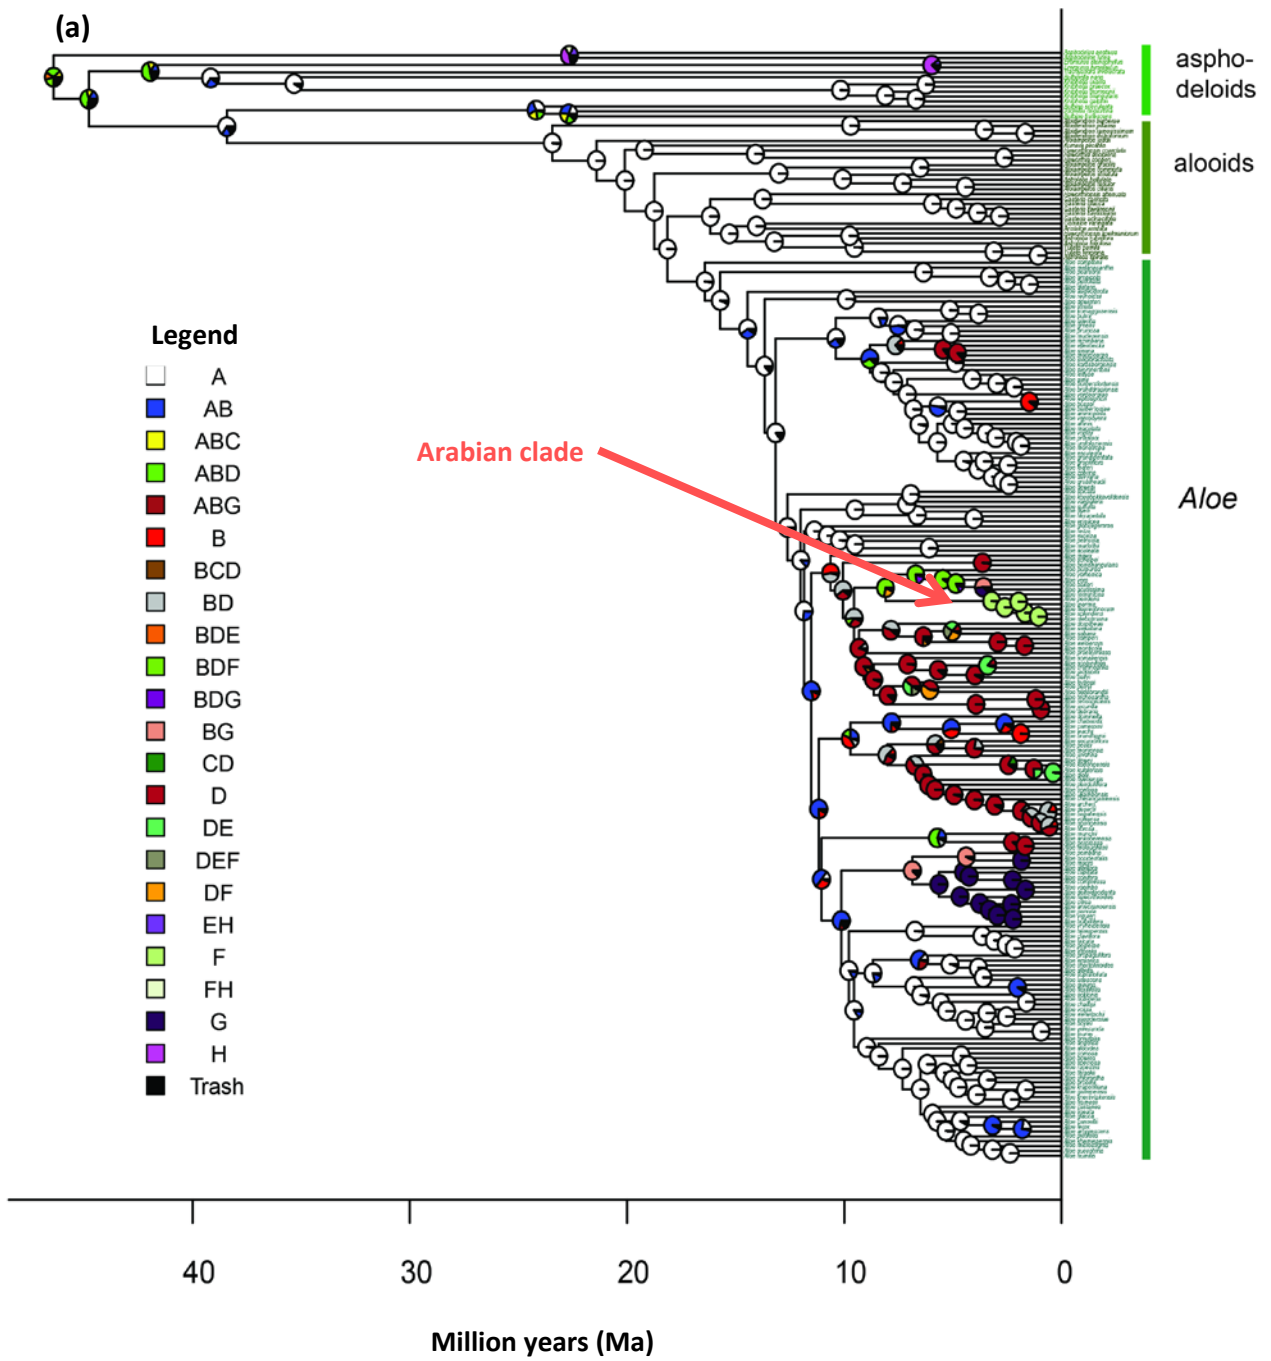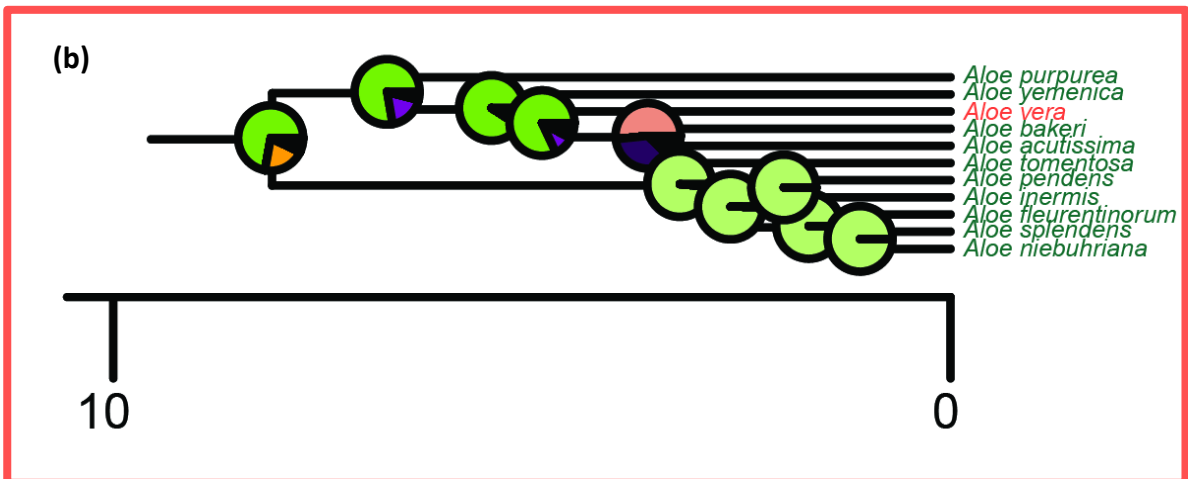

**Ancestral area reconstructions for Xanthorrhoeaceae subfamily Asphodeloideae.**

a) Ancestral areas displayed on the penalised likelihood-dated Bayesian consensus tree; b) detail of the clade containing *Aloe vera*. Legend refers to regions modified from (52) for this analysis: A, Southern Africa; B, Zambezi; C, Congolian; D, Ethiopian-Somalian; E, Saharan-Sudanian; F, Arabian; G, Madagascan; H, Eurasian; Trash, sum of ancestral area probabilities <0.1.
