# Supplementary material for: Evolutionary history and leaf succulence as explanations for medicinal use in aloes and the global popularity of Aloe vera
Source: PubMed Central journal article supplement (PMC4342203; doi:10.1186/s12862-015-0291-7), 2015-02-26
Supplement: 12862_2015_291_MOESM4_ESM.pdf [file 12862_2015_291_MOESM4_ESM.pdf]

**Additional file 4. Summary statistics for phylogenetic dataset.**

Sampling, sequence length and model selection for data partitions.

|                                                | ITS   | matK  | psbA    | rbcL    | rps16 | trnLF intron | trnLF spacer |
|------------------------------------------------|-------|-------|---------|---------|-------|--------------|--------------|
| Sequence alignment length                      | 799   | 1622  | 765     | 1362    | 1041  | 1143         | 530          |
| Number of taxa                                 | 175   | 207   | 64      | 92      | 159   | 55           | 55           |
| Model selected by Akaike Information Criterion | HKY+G | GTR+G | HKY+I+G | GTR+I+G | HKY+G | HKY+G        | HKY+G        |
